# Supplementary material for: Menschen mit Migrationsgeschichte in der COVID-19-Pandemie
Source: Springer Nature journal article supplement (doi:10.1007/s00103-023-03741-0), 2023-07-20
Supplement: MOESM1 [file 25825958]

## Onlinematerial

Tabelle A1: Zusammenhänge zwischen der Höhe des Äquivalenzeinkommens und der eingeschätzten Wahrscheinlichkeit, selbst von den vier verschiedenen indirekten sozioökonomischen Folgen der Pandemie (a-d) betroffen zu sein – Ergebnisse bivariater Analysen; GEDA Fokus (2021-2022), n=4.114.

|                                    | Äquivalenzeinkommen |        |      |               |        |      |               |        |      |
|------------------------------------|---------------------|--------|------|---------------|--------|------|---------------|--------|------|
|                                    | niedrig             |        |      | mittel        |        |      | hoch          |        |      |
|                                    | % (gewichtet)       | 95%-KI |      | % (gewichtet) | 95%-KI |      | % (gewichtet) | 95%-KI |      |
| <b>Verlust des Arbeitsplatzes</b>  |                     |        |      |               |        |      |               |        |      |
| 0%                                 | 57,7%               | 49,2   | 65,8 | 58,1%         | 53,2   | 62,9 | 69,7%         | 64,7   | 74,3 |
| 1% - 49%                           | 16,2%               | 11,1   | 23,0 | 20,3%         | 16,8   | 24,2 | 21,2%         | 17,1   | 25,9 |
| 50 - 100%                          | 13,5%               | 9,9    | 18,3 | 13,6%         | 11,3   | 16,3 | 6,3%          | 4,3    | 9,0  |
| „Das ist bereits passiert“         | 12,6%               | 8,6    | 17,9 | 8,0%          | 5,7    | 11,1 | 2,8%          | 1,5    | 5,2  |
| <b>Zahlungsschwierigkeiten</b>     |                     |        |      |               |        |      |               |        |      |
| 0%                                 | 56,4%               | 48,5   | 64,1 | 50,3%         | 45,2   | 55,3 | 64,7%         | 59,5   | 69,7 |
| 1% - 49%                           | 16,0%               | 11,8   | 21,3 | 23,2%         | 19,7   | 27,2 | 23,7%         | 19,6   | 28,2 |
| 50 - 100%                          | 15,7%               | 11,4   | 21,2 | 16,6%         | 13,9   | 19,6 | 9,1%          | 6,5    | 12,6 |
| „Das ist bereits passiert“         | 11,9%               | 8,0    | 17,3 | 10,0%         | 7,7    | 12,9 | 2,5%          | 1,4    | 4,6  |
| <b>Sozialleistungen beantragen</b> |                     |        |      |               |        |      |               |        |      |
| 0%                                 | 48,3%               | 39,9   | 56,9 | 51,4%         | 46,0   | 56,8 | 71,5%         | 66,4   | 76,1 |
| 1% - 49%                           | 18,1%               | 13,1   | 24,6 | 22,9%         | 19,3   | 27,0 | 21,1%         | 17,1   | 25,7 |
| 50 - 100%                          | 17,6%               | 13,8   | 22,5 | 15,9%         | 13,3   | 19,0 | 5,6%          | 3,6    | 8,6  |
| „Das ist bereits passiert“         | 15,8%               | 11,3   | 21,6 | 9,8%          | 6,8    | 13,9 | 1,8%          | 0,9    | 3,6  |
| <b>Lebensstandard einschränken</b> |                     |        |      |               |        |      |               |        |      |
| 0%                                 | 53,1%               | 44,2   | 61,8 | 47,9%         | 42,9   | 52,9 | 62,2%         | 56,2   | 67,9 |
| 1% - 49%                           | 14,8%               | 10,4   | 20,7 | 21,5%         | 18,4   | 24,9 | 25,7%         | 20,8   | 31,2 |
| 50 - 100%                          | 15,8%               | 11,6   | 21,2 | 16,5%         | 14,2   | 19,2 | 9,0%          | 6,3    | 12,8 |
| „Das ist bereits passiert“         | 16,3%               | 12,0   | 21,9 | 14,1%         | 11,3   | 17,6 | 3,2%          | 1,8    | 5,4  |

95%-KI: 95%-Konfidenzintervalle

Tabelle A2: Mit der Angabe einer hohen Lebenszufriedenheit assoziierte Faktoren - Ergebnisse der multivariablen Poisson-Regressionen; GEDA Fokus (2021-2022), n=4.114

|                                                       | Modell 1    |             |             |                  | Modell 2    |             |             |                  | Modell 3    |             |             |                  | Modell 4    |             |             |                  |
|-------------------------------------------------------|-------------|-------------|-------------|------------------|-------------|-------------|-------------|------------------|-------------|-------------|-------------|------------------|-------------|-------------|-------------|------------------|
|                                                       | PR          | (95%-KI)    |             | p-Wert           | PR          | (95%-KI)    |             | p-Wert           | PR          | (95%-KI)    |             | p-Wert           | PR          | (95%-KI)    |             | p-Wert           |
| <b>Geschlecht</b>                                     |             |             |             |                  |             |             |             |                  |             |             |             |                  |             |             |             |                  |
| weiblich                                              | 1,05        | 0,99        | 1,13        | 0,125            | 1,06        | 0,99        | 1,13        | 0,088            | 1,06        | 0,99        | 1,13        | 0,105            | 1,06        | 1,00        | 1,14        | 0,063            |
| männlich                                              | Ref.        |             |             |                  | Ref.        |             |             |                  | Ref.        |             |             |                  | Ref.        |             |             |                  |
| <b>Alter</b>                                          |             |             |             |                  |             |             |             |                  |             |             |             |                  |             |             |             |                  |
| 18 - 39 Jahre                                         | 0,99        | 0,92        | 1,07        | 0,850            | 0,99        | 0,92        | 1,07        | 0,858            | 0,99        | 0,92        | 1,08        | 0,871            | 1,00        | 0,93        | 1,08        | 0,959            |
| 40 - 59 Jahre                                         | Ref.        |             |             |                  | Ref.        |             |             |                  | Ref.        |             |             |                  | Ref.        |             |             |                  |
| 60 - 79 Jahre                                         | 0,86        | 0,72        | 1,03        | 0,096            | 0,84        | 0,71        | 1,00        | 0,046            | 0,85        | 0,72        | 1,01        | 0,063            | 0,85        | 0,72        | 1,02        | 0,073            |
| <b>Bildung (ISCED 2011)</b>                           |             |             |             |                  |             |             |             |                  |             |             |             |                  |             |             |             |                  |
| niedrig                                               | 1,04        | 0,96        | 1,12        | 0,018            | 1,02        | 0,94        | 1,10        | 0,632            | 1,04        | 0,96        | 1,12        | 0,327            | 1,03        | 0,95        | 1,11        | 0,508            |
| mittel                                                | Ref.        |             |             |                  | Ref.        |             |             |                  | Ref.        |             |             |                  | Ref.        |             |             |                  |
| hoch                                                  | 1,02        | 0,94        | 1,11        | 0,561            | 1,01        | 0,93        | 1,10        | 0,727            | 1,02        | 0,94        | 1,11        | 0,674            | 1,01        | 0,93        | 1,09        | 0,852            |
| <b>Äquivalenzeinkommen</b>                            |             |             |             |                  |             |             |             |                  |             |             |             |                  |             |             |             |                  |
| niedrig                                               | 0,89        | 0,78        | 1,01        | 0,061            | <b>0,87</b> | <b>0,77</b> | <b>0,99</b> | <b>0,032</b>     | 0,89        | 0,79        | 1,01        | 0,062            | <b>0,87</b> | <b>0,77</b> | <b>0,99</b> | <b>0,034</b>     |
| mittel                                                | Ref.        |             |             |                  | Ref.        |             |             |                  | Ref.        |             |             |                  | Ref.        |             |             |                  |
| hoch                                                  | <b>1,18</b> | <b>1,08</b> | <b>1,28</b> | <b>&lt;0,001</b> | <b>1,16</b> | <b>1,06</b> | <b>1,26</b> | <b>0,001</b>     | <b>1,15</b> | <b>1,05</b> | <b>1,25</b> | <b>0,002</b>     | <b>1,15</b> | <b>1,06</b> | <b>1,26</b> | <b>0,001</b>     |
| <b>Deutschkenntnisse</b>                              |             |             |             |                  |             |             |             |                  |             |             |             |                  |             |             |             |                  |
| Muttersprache/ sehr gut                               | Ref.        |             |             |                  | Ref.        |             |             |                  | Ref.        |             |             |                  | Ref.        |             |             |                  |
| gut/ mittelmäßig                                      | 0,94        | 0,86        | 1,02        | 0,111            | 0,93        | 0,86        | 1,01        | 0,098            | 0,94        | 0,87        | 1,02        | 0,121            | 0,93        | 0,86        | 1,01        | 0,087            |
| schlecht/ sehr schlecht                               | <b>0,79</b> | <b>0,65</b> | <b>0,96</b> | <b>0,020</b>     | <b>0,81</b> | <b>0,67</b> | <b>0,98</b> | <b>0,031</b>     | <b>0,80</b> | <b>0,66</b> | <b>0,97</b> | <b>0,022</b>     | <b>0,80</b> | <b>0,66</b> | <b>0,98</b> | <b>0,028</b>     |
| <b>Einkommensveränderung seit der Corona-Pandemie</b> |             |             |             |                  |             |             |             |                  |             |             |             |                  |             |             |             |                  |
| verbessert                                            | 0,98        | 0,88        | 1,10        | 0,737            | 0,96        | 0,86        | 1,07        | 0,480            | 0,97        | 0,87        | 1,09        | 0,601            | 0,97        | 0,87        | 1,09        | 0,602            |
| gleich geblieben                                      | Ref.        |             |             |                  | Ref.        |             |             |                  | Ref.        |             |             |                  | Ref.        |             |             |                  |
| verschlechtert                                        | <b>0,89</b> | <b>0,81</b> | <b>0,99</b> | <b>0,027</b>     | 0,92        | 0,84        | 1,02        | 0,124            | 0,92        | 0,83        | 1,01        | 0,084            | <b>0,90</b> | <b>0,82</b> | <b>0,99</b> | <b>0,038</b>     |
| <b>Verlust des Arbeitsplatzes</b>                     |             |             |             |                  |             |             |             |                  |             |             |             |                  |             |             |             |                  |
| 0%                                                    | Ref.        |             |             |                  |             |             |             |                  |             |             |             |                  |             |             |             |                  |
| 1% - 49%                                              | 0,99        | 0,90        | 1,09        | 0,839            |             |             |             |                  |             |             |             |                  |             |             |             |                  |
| 50 - 100%                                             | <b>0,75</b> | <b>0,64</b> | <b>0,88</b> | <b>0,001</b>     |             |             |             |                  |             |             |             |                  |             |             |             |                  |
| „Das ist bereits passiert“                            | <b>0,62</b> | <b>0,49</b> | <b>0,79</b> | <b>&lt;0,001</b> |             |             |             |                  |             |             |             |                  |             |             |             |                  |
| <b>Zahlungsschwierigkeiten</b>                        |             |             |             |                  |             |             |             |                  |             |             |             |                  |             |             |             |                  |
| 0%                                                    |             |             |             |                  | Ref.        |             |             |                  |             |             |             |                  |             |             |             |                  |
| 1% - 49%                                              |             |             |             |                  | 0,93        | 0,85        | 1,02        | 0,114            |             |             |             |                  |             |             |             |                  |
| 50 - 100%                                             |             |             |             |                  | <b>0,70</b> | <b>0,59</b> | <b>0,82</b> | <b>&lt;0,001</b> |             |             |             |                  |             |             |             |                  |
| „Das ist bereits passiert“                            |             |             |             |                  | <b>0,61</b> | <b>0,47</b> | <b>0,78</b> | <b>&lt;0,001</b> |             |             |             |                  |             |             |             |                  |
| <b>Sozialleistungen beantragen</b>                    |             |             |             |                  |             |             |             |                  |             |             |             |                  |             |             |             |                  |
| 0%                                                    |             |             |             |                  |             |             |             |                  | Ref.        |             |             |                  |             |             |             |                  |
| 1% - 49%                                              |             |             |             |                  |             |             |             |                  | 0,93        | 0,85        | 1,02        | 0,113            |             |             |             |                  |
| 50 - 100%                                             |             |             |             |                  |             |             |             |                  | <b>0,67</b> | <b>0,57</b> | <b>0,78</b> | <b>&lt;0,001</b> |             |             |             |                  |
| „Das ist bereits passiert“                            |             |             |             |                  |             |             |             |                  | <b>0,64</b> | <b>0,51</b> | <b>0,80</b> | <b>&lt;0,001</b> |             |             |             |                  |
| <b>Lebensstandard einschränken</b>                    |             |             |             |                  |             |             |             |                  |             |             |             |                  |             |             |             |                  |
| 0%                                                    |             |             |             |                  |             |             |             |                  |             |             |             |                  | Ref.        |             |             |                  |
| 1% - 49%                                              |             |             |             |                  |             |             |             |                  |             |             |             |                  | 0,94        | 0,86        | 1,03        | 0,207            |
| 50 - 100%                                             |             |             |             |                  |             |             |             |                  |             |             |             |                  | <b>0,82</b> | <b>0,72</b> | <b>0,93</b> | <b>0,003</b>     |
| „Das ist bereits passiert“                            |             |             |             |                  |             |             |             |                  |             |             |             |                  | <b>0,63</b> | <b>0,53</b> | <b>0,76</b> | <b>&lt;0,001</b> |

Ref.: Referenzkategorie; PR: Prevalence Ratios; 95%-KI: 95%-Konfidenzintervalle; Fettdruck: statistisch signifikant; alle Modelle adjustiert für Staatsangehörigkeit nach Einwohnermelderegister.
